# Supplementary material
Source: ML conference proceedings conference paper supplement (https://proceedings.mlr.press/v89/li19c.html)
Supplement: Supplementary file 1 [file li19c-supp.pdf]

## A Appendix

Here, we report the proofs missing from the main text.

### A.1 Details of Example 1

Consider the function  $f(x) = \frac{1}{2}x^2$ . The gradient in  $t$ -th iteration is  $\nabla f(x_t) = x_t$ . Let the stochastic gradient be defined as  $\mathbf{g}_t = \nabla f(x_t) + \xi_t$ , where  $P(\xi_t = \sigma_t) = \frac{7}{15}$ ,  $P(\xi_t = -\frac{3}{2}\sigma_t) = \frac{1}{5}$  and  $P(\xi_t = -\frac{1}{2}\sigma_t) = \frac{1}{3}$ .

Let  $A \triangleq \sum_{i=1}^{t-1} g_i^2 + \beta$ . Then

$$\langle \mathbb{E}_t \eta_{t+1} \mathbf{g}_t, \nabla f(x_t) \rangle = \alpha \left[ \frac{7}{15} \frac{(x_t + \sigma_t)x_t}{[A + (x_t + \sigma_t)^2]^{\frac{1}{2} + \epsilon}} + \frac{1}{5} \frac{(x_t - \frac{3}{2}\sigma_t)x_t}{[A + (x_t - \frac{3}{2}\sigma_t)^2]^{\frac{1}{2} + \epsilon}} + \frac{1}{3} \frac{(x_t - \frac{1}{2}\sigma_t)x_t}{[A + (x_t - \frac{1}{2}\sigma_t)^2]^{\frac{1}{2} + \epsilon}} \right].$$

This expression can be negative, for example, setting  $x_t = 1$ ,  $\sigma_t = 10$ ,  $A = 10$ ,  $\epsilon = 0$  or  $\epsilon = 0.1$ .

### A.2 Proof of Lemma 2

**Lemma 9.** *Let  $a_i \geq 0, \dots, T$  and  $f : [0, +\infty) \rightarrow [0, +\infty)$  nonincreasing function. Then*

$$\sum_{t=1}^T a_t f\left(a_0 + \sum_{i=1}^t a_i\right) \leq \int_{a_0}^{\sum_{t=0}^T a_t} f(x) dx.$$

*Proof.* Denote by  $s_t = \sum_{i=0}^t a_i$ .

$$a_i f(s_i) = \int_{s_{i-1}}^{s_i} f(s_i) dx \leq \int_{s_{i-1}}^{s_i} f(x) dx.$$

Summing over  $i = 1, \dots, T$ , we have the stated bound. □

*Proof of Lemma 2.* The proof is immediate from Lemma 9. □

### A.3 Proofs of Section 6.1

*Proof of Lemma 4.* From (4), for any  $\mathbf{x}, \mathbf{y} \in \mathbb{R}^d$ , we have

$$f(\mathbf{x} + \mathbf{y}) \leq f(\mathbf{x}) + \langle \nabla f(\mathbf{x}), \mathbf{y} \rangle + \frac{M}{2} \|\mathbf{y}\|^2.$$

Take  $\mathbf{y} = -\frac{1}{M} \nabla f(\mathbf{x})$ , to have

$$f(\mathbf{x} + \mathbf{y}) \leq f(\mathbf{x}) + \left( \frac{1}{2M} - \frac{1}{M} \right) \|\nabla f(\mathbf{x})\|^2.$$

Hence,

$$\|\nabla f(\mathbf{x})\|^2 \leq 2M(f(\mathbf{x}) - f(\mathbf{x} + \mathbf{y})) \leq 2M(f(\mathbf{x}) - \min_{\mathbf{u}} f(\mathbf{u})). \quad \square$$

*Proof of Lemma 5.* If  $A \leq Bx$ , then  $x \leq C(2Bx)^{\frac{1}{2} + \epsilon}$ , so  $x \leq \left[ C(2B)^{\frac{1}{2} + \epsilon} \right]^{\frac{1}{1/2 - \epsilon}}$ . And if  $A > Bx$ , then  $x < C(2A)^{\frac{1}{2} + \epsilon}$ . Taking the maximum of the two cases, we have the stated bound. □

*Proof of Lemma 6.* Assume that  $Bx > A$ . We have that

$$x^2 \leq (A + Bx)(C + D \ln(A + Bx)) < 2Bx(C + D \ln(2Bx)) < 2Bx(C + 2D\sqrt{2Bx}),$$

that is

$$x < 2BC + 4BD\sqrt{2Bx}.$$

We can solve this inequality, to obtain

$$x < 32B^3D^2 + 2BC + 8B^2D\sqrt{C}.$$

On the other hand, if  $Bx \leq A$ , we have  $x \leq \frac{A}{B}$ . Taking the sum of these two case, we have the stated bound.  $\square$

*Proof of Lemma 7.* Let  $f(x) = (x + y)^p - x^p - y^p$ . We can see that  $f'(x) = p(x + y)^{p-1} - px^{p-1} \leq 0$  when  $x, y \geq 0$ . So  $f(x) \leq f(0) = 0$ . The inequality holds.  $\square$

**Lemma 10.** *If  $x > 0$ ,  $\alpha > 0$ , then  $\ln(x) \leq \alpha(x^{\frac{1}{\alpha}} - 1)$ .*

*Proof of Lemma 10.* Let  $f(x) = \ln(x) - \alpha x^{\frac{1}{\alpha}} + \alpha$ .  $f'(x) = \frac{1}{x} - x^{\frac{1}{\alpha}-1}$  is positive when  $0 < x < 1$ ,  $f'(1) = 0$  and  $f'(x) < 0$  when  $x > 1$ . So  $f(x) \leq f(1) = 0$ . The inequality holds.  $\square$

*Proof of Lemma 8.* Using the assumption on the noise, we have

$$\begin{aligned} \exp\left(\frac{\mathbb{E}\left[\max_{1 \leq i \leq T} \|\nabla f(\mathbf{x}_i) - \mathbf{g}(\mathbf{x}_i, \xi_i)\|^2\right]}{\sigma^2}\right) &\leq \mathbb{E}\left[\exp\left(\frac{\max_{1 \leq i \leq T} \|\nabla f(\mathbf{x}_i) - \mathbf{g}(\mathbf{x}_i, \xi_i)\|^2}{\sigma^2}\right)\right] \\ &= \mathbb{E}\left[\max_{1 \leq i \leq T} \exp\left(\frac{\|\nabla f(\mathbf{x}_i) - \mathbf{g}(\mathbf{x}_i, \xi_i)\|^2}{\sigma^2}\right)\right] \leq \sum_{i=1}^T \mathbb{E}\left[\exp\left(\frac{\|\nabla f(\mathbf{x}_i) - \mathbf{g}(\mathbf{x}_i, \xi_i)\|^2}{\sigma^2}\right)\right] \\ &= \sum_{i=1}^T \mathbb{E}\left[\mathbb{E}_i\left[\exp\left(\frac{\|\nabla f(\mathbf{x}_i) - \mathbf{g}(\mathbf{x}_i, \xi_i)\|^2}{\sigma^2}\right)\right]\right] \leq Te, \end{aligned}$$

that implies

$$\mathbb{E}\left[\max_{1 \leq i \leq T} \|\nabla f(\mathbf{x}_i) - \mathbf{g}(\mathbf{x}_i, \xi_i)\|^2\right] \leq \sigma^2(1 + \ln T). \quad (12)$$

Hence, when  $\epsilon > 0$ , we have

$$\begin{aligned} \mathbb{E}\left[\sum_{t=1}^T \eta_t^2 \|\mathbf{g}(\mathbf{x}_t, \xi_t)\|^2\right] &= \mathbb{E}\left[\sum_{t=1}^T \eta_{t+1}^2 \|\mathbf{g}(\mathbf{x}_t, \xi_t)\|^2 + \sum_{t=1}^T \|\mathbf{g}(\mathbf{x}_t, \xi_t)\|^2 (\eta_t^2 - \eta_{t+1}^2)\right] \\ &= \mathbb{E}\left[\sum_{t=1}^T \eta_{t+1}^2 \|\mathbf{g}(\mathbf{x}_t, \xi_t)\|^2 + \sum_{t=1}^T \|\mathbf{g}(\mathbf{x}_t, \xi_t)\|^2 (\eta_t + \eta_{t+1})(\eta_t - \eta_{t+1})\right] \\ &\leq \mathbb{E}\left[\sum_{t=1}^T \eta_{t+1}^2 \|\mathbf{g}(\mathbf{x}_t, \xi_t)\|^2 + \sum_{t=1}^T 2\eta_t \|\mathbf{g}(\mathbf{x}_t, \xi_t)\|^2 (\eta_t - \eta_{t+1})\right] \\ &\leq \frac{\alpha^2}{2\epsilon\beta^{2\epsilon}} + 2\eta_1 \mathbb{E}\left[\max_{1 \leq t \leq T} \eta_t \|\mathbf{g}(\mathbf{x}_t, \xi_t)\|^2\right] \\ &\leq \frac{\alpha^2}{2\epsilon\beta^{2\epsilon}} + 4\eta_1 \mathbb{E}\left[\max_{1 \leq t \leq T} \eta_t (\|\mathbf{g}(\mathbf{x}_t, \xi_t) - \nabla f(\mathbf{x}_t)\|^2 + \|\nabla f(\mathbf{x}_t)\|^2)\right] \\ &\leq \frac{\alpha^2}{2\epsilon\beta^{2\epsilon}} + 4\eta_1^2(1 + \ln T)\sigma^2 + 4\eta_1 \mathbb{E}\left[\sum_{t=1}^T \eta_t \|\nabla f(\mathbf{x}_t)\|^2\right] \\ &= \frac{\alpha^2}{2\epsilon\beta^{2\epsilon}} + \frac{4\alpha^2}{\beta^{1+2\epsilon}}(1 + \ln T)\sigma^2 + \frac{4\alpha}{\beta^{\frac{1}{2}+\epsilon}} \mathbb{E}\left[\sum_{t=1}^T \eta_t \|\nabla f(\mathbf{x}_t)\|^2\right], \end{aligned}$$

where in second inequality we used Lemma 2 and in fourth one we used (12). Note that the analysis after the second inequality also holds when  $\epsilon = 0$ .

And when  $\epsilon = 0$ , we have

$$\begin{aligned}
 \mathbb{E} \left[ \sum_{t=1}^T \eta_{t+1}^2 \|\mathbf{g}(\mathbf{x}_t, \xi_t)\|^2 \right] &= \mathbb{E} \left[ \sum_{t=1}^T \frac{\alpha^2 \|\mathbf{g}(\mathbf{x}_t, \xi_t)\|^2}{(\beta + \sum_{i=1}^t \|\mathbf{g}(\mathbf{x}_i, \xi_i)\|^2)} \right] \\
 &\leq 2\alpha^2 \mathbb{E} \left[ \ln \left( \sqrt{\beta + \sum_{t=1}^T \|\mathbf{g}(\mathbf{x}_t, \xi_t)\|^2} \right) \right] \\
 &\leq 2\alpha^2 \mathbb{E} \left[ \ln \left( \sqrt{\beta + 2 \sum_{t=1}^T \|\mathbf{g}(\mathbf{x}_t, \xi_t) - \nabla f(\mathbf{x}_t)\|^2} + \sqrt{2 \sum_{t=1}^T \|\nabla f(\mathbf{x}_t)\|^2} \right) \right] \\
 &\leq 2\alpha^2 \ln \left( \sqrt{\beta + 2T\sigma^2} + \sqrt{2} \mathbb{E} \left[ \sqrt{\sum_{t=1}^T \|\nabla f(\mathbf{x}_t)\|^2} \right] \right)
 \end{aligned}$$

where in first inequality we used Lemma 10 and in the third one we used Jensen's inequality. Putting things together, we have

$$\begin{aligned}
 \mathbb{E} \left[ \sum_{t=1}^T \eta_t^2 \|\mathbf{g}(\mathbf{x}_t, \xi_t)\|^2 \right] &= \mathbb{E} \left[ \sum_{t=1}^T \eta_{t+1}^2 \|\mathbf{g}(\mathbf{x}_t, \xi_t)\|^2 + \sum_{t=1}^T \|\mathbf{g}(\mathbf{x}_t, \xi_t)\|^2 (\eta_t^2 - \eta_{t+1}^2) \right] \\
 &\leq 2\alpha^2 \ln \left( \sqrt{\beta + 2T\sigma^2} + \sqrt{2} \mathbb{E} \left[ \sqrt{\sum_{t=1}^T \|\nabla f(\mathbf{x}_t)\|^2} \right] \right) + \frac{4\alpha^2}{\beta} (1 + \ln T) \sigma^2 + \frac{4\alpha}{\beta^{\frac{1}{2}}} \mathbb{E} \left[ \sum_{t=1}^T \eta_t \|\nabla f(\mathbf{x}_t)\|^2 \right]
 \end{aligned}$$

□

#### A.4 Proofs of Section 5

*Proof of Lemma 3.* From (4), we have

$$\begin{aligned}
 f(\mathbf{x}_{t+1}) &\leq f(\mathbf{x}_t) + \langle \nabla f(\mathbf{x}_t), \mathbf{x}_{t+1} - \mathbf{x}_t \rangle + \frac{M}{2} \|\mathbf{x}_{t+1} - \mathbf{x}_t\|^2 \\
 &= f(\mathbf{x}_t) + \langle \nabla f(\mathbf{x}_t), \boldsymbol{\eta}_t (\nabla f(\mathbf{x}_t) - \mathbf{g}(\mathbf{x}_t, \xi_t)) \rangle - \langle \nabla f(\mathbf{x}_t), \boldsymbol{\eta}_t \nabla f(\mathbf{x}_t) \rangle + \frac{M}{2} \|\boldsymbol{\eta}_t \mathbf{g}(\mathbf{x}_t, \xi_t)\|^2.
 \end{aligned}$$

Taking the conditional expectation with respect to  $\xi_1, \dots, \xi_{t-1}$ , we have that

$$\mathbb{E}_t[\langle \nabla f(\mathbf{x}_t), \boldsymbol{\eta}_t (\nabla f(\mathbf{x}_t) - \mathbf{g}(\mathbf{x}_t, \xi_t)) \rangle] = \langle \nabla f(\mathbf{x}_t), \boldsymbol{\eta}_t \nabla f(\mathbf{x}_t) - \boldsymbol{\eta}_t \mathbb{E}_t[\mathbf{g}(\mathbf{x}_t, \xi_t)] \rangle = 0.$$

Hence, from the law of total expectation, we have

$$\mathbb{E}[\langle \nabla f(\mathbf{x}_t), \boldsymbol{\eta}_t \nabla f(\mathbf{x}_t) \rangle] \leq \mathbb{E} \left[ f(\mathbf{x}_t) - f(\mathbf{x}_{t+1}) + \frac{M}{2} \|\boldsymbol{\eta}_t \mathbf{g}(\mathbf{x}_t, \xi_t)\|^2 \right].$$

Summing over  $t = 1$  to  $T$  and lower bounding  $f(\mathbf{x}_{T+1})$  with  $f^*$ , we have the stated bound. □

*Proof of Lemma 1.* Since the series  $\sum_{t=1}^{\infty} a_t$  diverges, given that  $\sum_{t=1}^{\infty} a_t b_t$  converges, we necessarily have  $\liminf_{t \rightarrow \infty} b_t = 0$ . So there exists a subsequence  $\{b_{i(t)}\}$  of  $\{b_t\}$  such that  $\lim_{t \rightarrow \infty} b_{i(t)} = 0$ .

Let us proceed by contradiction and assume that there exists some  $\alpha > 0$  and some other subsequence  $\{b_{m(t)}\}$  of  $\{b_t\}$  such that  $b_{m(t)} \geq \alpha$  for all  $t$ . In this case, we can construct a third subsequence  $\{b_{j(t)}\}$  of  $\{b_t\}$  where the subindices  $j(t)$  are chosen in the following way:

$$j(0) = \min\{l \geq 0 : b_l \geq \alpha\}$$

and, given  $j(2t)$ ,

$$j(2t+1) = \min\{l \geq j(2t) : b_l \leq \frac{1}{2}\alpha\}, \quad (13)$$

$$j(2t+2) = \min\{l \geq j(2t+1) : b_l \leq \frac{1}{2}\alpha\}. \quad (14)$$

Note that the existence of  $\{b_{i(t)}\}$  and  $\{b_{m(t)}\}$  guarantees that  $j(t)$  is well defined. Also by (13) and (14)

$$b_l \leq \frac{\alpha}{2} \text{ for } j(2t) \leq l \leq j(2t+1) - 1.$$

Then, denoting  $\phi_t = \sum_{l=2t}^{j(2t+1)-1} a_l$ , we have

$$\infty > \sum_{t=1}^{\infty} a_t b_t \geq \sum_{t=1}^{\infty} \sum_{l=2t}^{j(2t+1)-1} a_l b_l \leq \frac{\alpha}{2} \sum_{t=1}^{\infty} \phi_t.$$

Therefore, we have  $\lim_{t \rightarrow \infty} \phi_t = 0$ .

On the other hand, by (13) and (14), we have  $b_{j(2t)} \geq \alpha$ ,  $b_{j(2t+1)} \leq \frac{1}{\alpha}$ , so that

$$\frac{\alpha}{2} \leq b_{j(2t)} - b_{j(2t+1)} = \sum_{l=j(2t)}^{j(2t+1)-1} (b_l - b_{l+1}) \leq \sum_{l=j(2t)}^{j(2t+1)-1} K a_l = K \phi_t.$$

So  $\phi_t \geq \frac{\alpha}{2K}$ , which is in contradiction with  $\lim_{t \rightarrow \infty} \phi_t = 0$ . Therefore,  $b_t$  goes to zero. □

*Proof of Theorem 2.* We proceed similarly to the proof of Theorem 1, to get

$$\mathbb{E} \left[ \sum_{t=1}^{\infty} \langle \nabla f(\mathbf{x}_t), \boldsymbol{\eta}_t \nabla f(\mathbf{x}_t) \rangle \right] \leq f(\mathbf{x}_1) - f(\mathbf{x}^*) + \frac{M}{2} \mathbb{E} \left[ \sum_{t=1}^{\infty} \|\boldsymbol{\eta}_t \mathbf{g}(\mathbf{x}_t, \xi_t)\|_2^2 \right].$$

Observe that

$$\sum_{t=1}^{\infty} \|\boldsymbol{\eta}_t \mathbf{g}(\mathbf{x}_t, \xi_t)\|^2 = \sum_{t=1}^{\infty} \sum_{i=1}^d \eta_{t,i}^2 \mathbf{g}(\mathbf{x}_t, \xi_t)_i^2 = \sum_{i=1}^d \sum_{t=1}^{\infty} \eta_{t,i}^2 \mathbf{g}(\mathbf{x}_t, \xi_t)_i^2 < \infty,$$

where the last inequality comes from the same reasoning in (5). Hence, we have

$$\mathbb{E} \left[ \sum_{t=1}^{\infty} \langle \nabla f(\mathbf{x}_t), \boldsymbol{\eta}_t \nabla f(\mathbf{x}_t) \rangle \right] < \infty.$$

Hence, with probability 1, we have

$$\sum_{t=1}^{\infty} \langle \nabla f(\mathbf{x}_t), \boldsymbol{\eta}_t \nabla f(\mathbf{x}_t) \rangle = \sum_{t=1}^{\infty} \sum_{j=1}^d \eta_{t,j} \nabla f(\mathbf{x}_t)_j^2 = \sum_{j=1}^d \sum_{t=1}^{\infty} \eta_{t,j} \nabla f(\mathbf{x}_t)_j^2 < \infty.$$

and, for any  $j = 1, \dots, d$ ,

$$\sum_{t=1}^{\infty} \eta_{t,j} (\nabla f(\mathbf{x}_t))_j^2 < \infty.$$

Now, observe that the Lipschitzness of  $f$  and the bounded support of the noise on the gradients gives

$$\sum_{t=1}^{\infty} \eta_{t,j} = \sum_{t=1}^{\infty} \frac{\alpha}{(\beta + \sum_{i=1}^{t-1} (g(\mathbf{x}_i, \xi_i)_j)^2)^{1/2+\epsilon}} \geq \sum_{t=1}^{\infty} \frac{\alpha}{(\beta + 2(t-1)(L^2 + S^2))^{1/2+\epsilon}} = \infty.$$

Using the fact the  $f$  is  $L$ -Lipschitz and  $M$ -smooth, we also have

$$\begin{aligned} |((\nabla f(\mathbf{x}_{t+1}))_j)^2 - ((\nabla f(\mathbf{x}_t))_j)^2| &= ((\nabla f(\mathbf{x}_{t+1}))_j + (\nabla f(\mathbf{x}_t))_j) \cdot |(\nabla f(\mathbf{x}_{t+1}))_j - (\nabla f(\mathbf{x}_t))_j| \\ &\leq 2LM\|\mathbf{x}_{t+1} - \mathbf{x}_t\| = 2LM\|\boldsymbol{\eta}_t \mathbf{g}(\mathbf{x}_t, \xi_t)\| \leq 2LM(L + S)\eta_t. \end{aligned}$$

Hence, we can use Lemma 1 to obtain

$$\lim_{t \rightarrow \infty} ((\nabla f(\mathbf{x}_t))_j)^2 = 0.$$

For the second statement, observe that, with probability 1,

$$\sum_{t=1}^{\infty} ((\nabla f(\mathbf{x}_t))_j)^2 t^{1/2-\epsilon} \frac{\alpha}{t(2L^2 + 2S^2 + \beta)^{1/2+\epsilon}} \leq \sum_{t=1}^{\infty} \eta_{t,j} (\nabla f(\mathbf{x}_t))_j^2 < \infty.$$

Hence, noting that  $\sum_{t=1}^{\infty} \frac{1}{t} = \infty$ , we have that  $\liminf_{t \rightarrow \infty} ((\nabla f(\mathbf{x}_t))_j)^2 t^{1/2-\epsilon} = 0$ . □
